# Supplementary material for: A library of cancer testis specific T cell receptors for T cell receptor gene therapy
Source: PubMed Central journal article supplement (PMC9792401; doi:10.1016/j.omto.2022.11.007), 2022-12-02
Supplement: mmc1.pdf [file mmc1.pdf]

**Supplemental information**

**A library of cancer testis specific T cell  
receptors for T cell receptor gene therapy**

**Marije A.J. de Rooij, Dennis F.G. Remst, Dirk M. van der Steen, Anne K. Wouters, Renate S. Hagedoorn, Michel G.D. Kester, Miranda H. Meeuwsen, Tassilo L.A. Wachsmann, Arnoud H. de Ru, Peter A. van Veelen, Els M.E. Verdegaal, J.H. Frederik Falkenburg, and Mirjam H.M. Heemskerk**

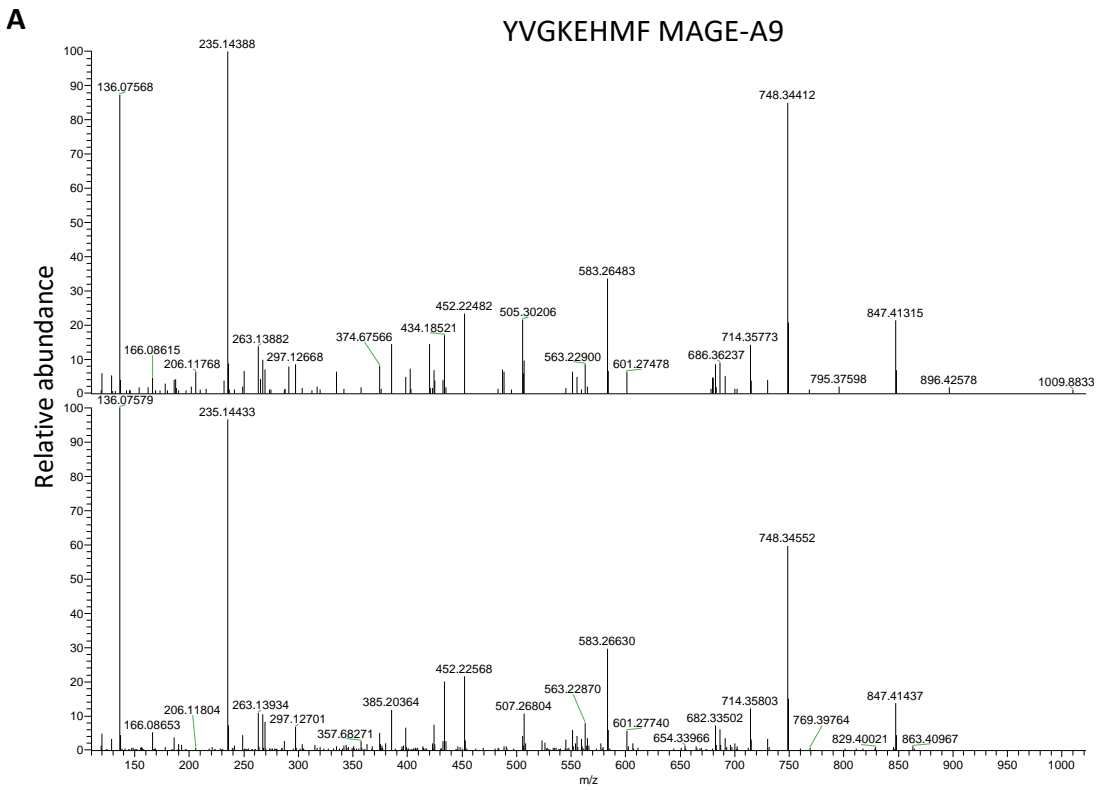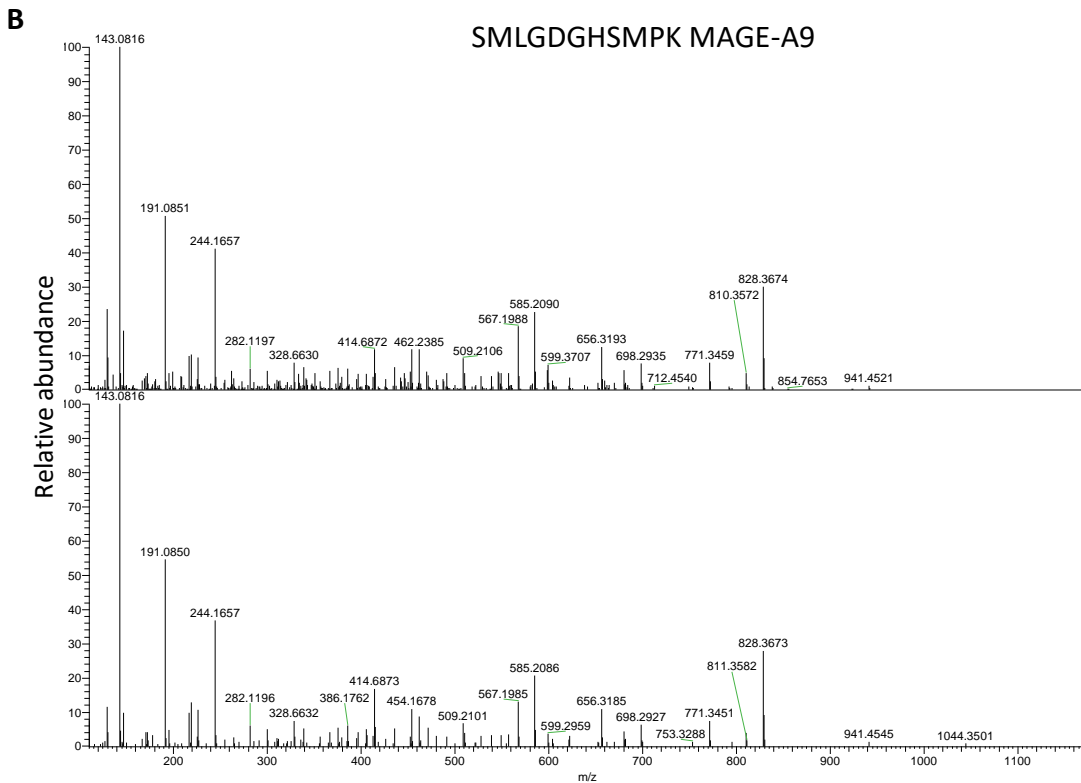

**Figure S1. Peptide sequence validation of matching tandem mass spectra of eluted (top) and synthetically (bottom) generated peptides.** Two examples of matching tandem mass spectra of (A) the YVGKEHMF peptide presented in HLA-A\*24:02 and (B) the SMLGDGHSMPK peptide presented in HLA-A\*03:01. Both depicted peptides are derived from MAGE-A9.

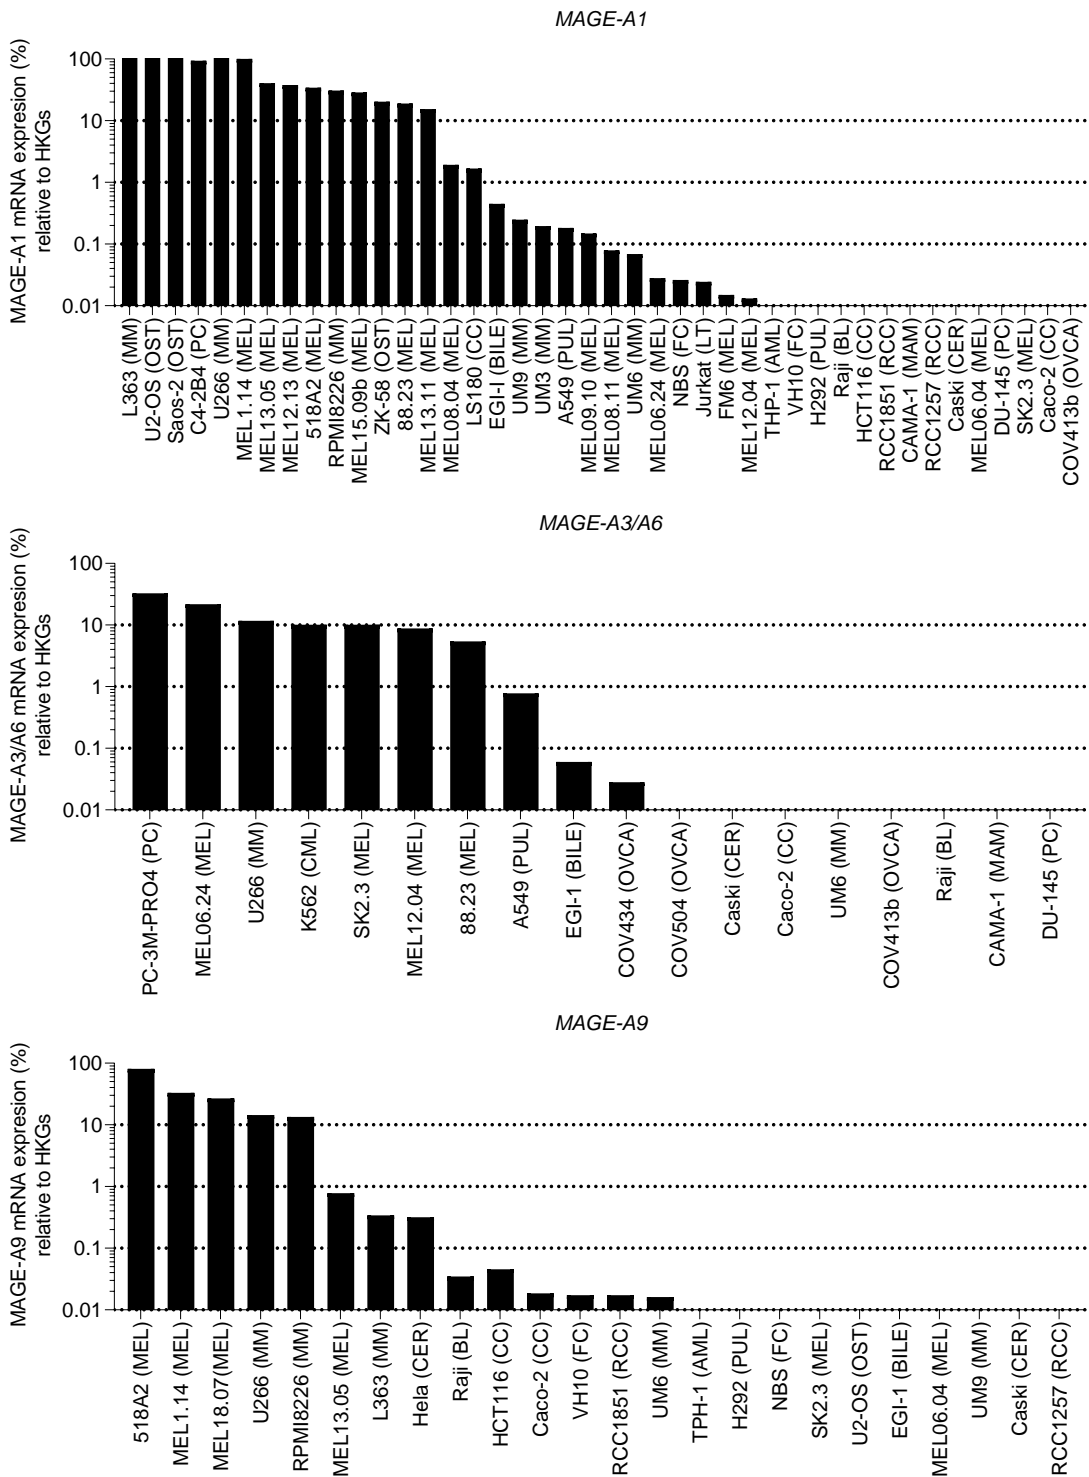

**Figure S2. Target gene expression levels of *MAGE-A1*, *MAGE-A3/A6* and *MAGE-A9* mRNA levels.** The expression levels were measured by qPCR for multiple cell lines with different origin including; multiple myeloma (MM), melanoma (MEL), prostate carcinoma (PC), fibroblast (FC), Burkitt lymphoma (BL), renal cell carcinoma (RCC), ovarium carcinoma (OVCA), colon carcinoma (CC), cervical carcinoma (CER), pulmonary carcinoma (PUL), leukemic T-cell lymphoblast (LT), bile duct carcinoma (BILE), osteosarcoma (OST), acute myeloid leukaemia (AML), chronic myeloid leukaemia (CML) cell lines and mammary carcinoma (MAM). Gene expression >0.01 is depicted in the graph relative to housekeeping genes (HKG). Values <0.01 relative gene expression are not depicted. *MAGE-A3* and *MAGE-A6* gene expression could not be discriminated from each other by qPCR.

IFN $\gamma$  (ng/ml)

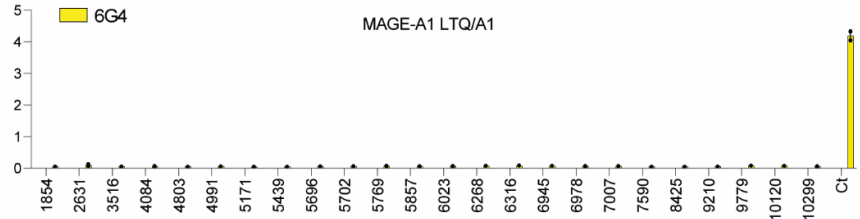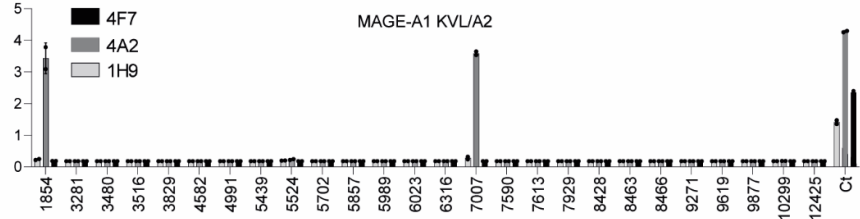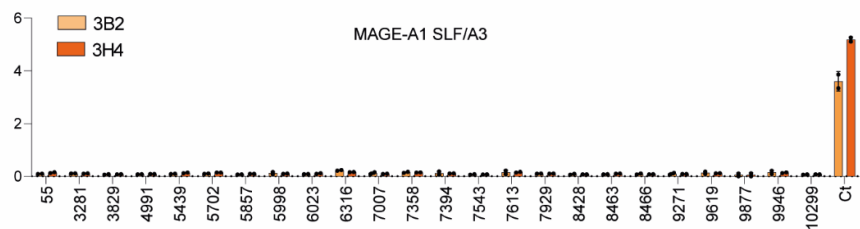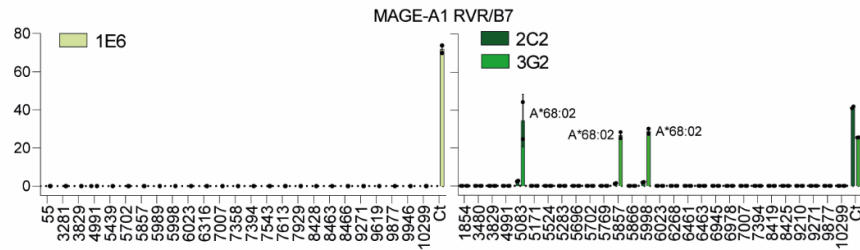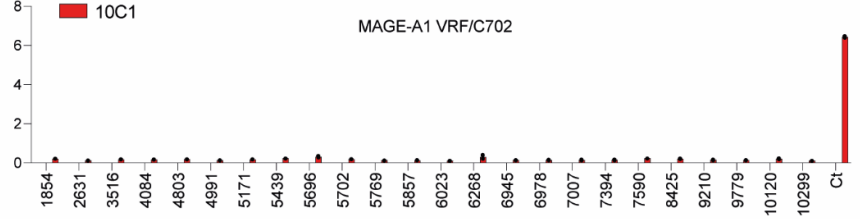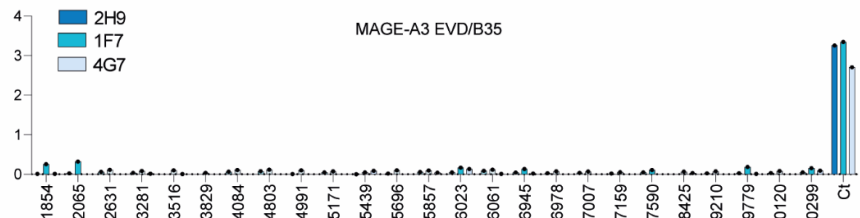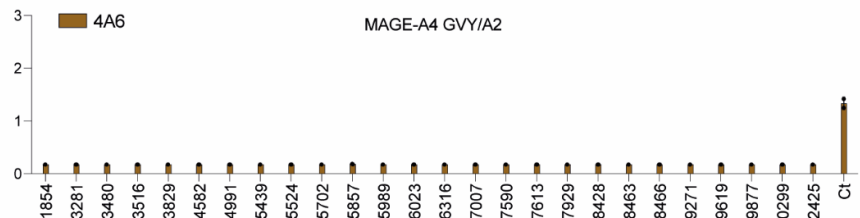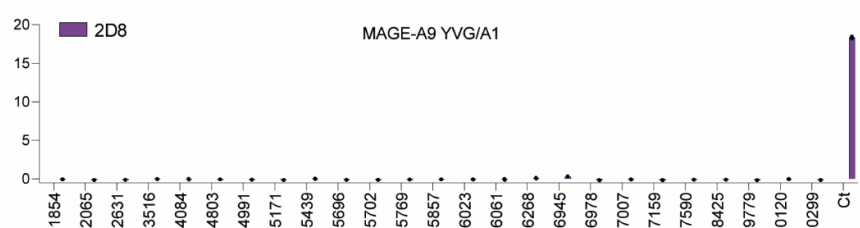

**Figure S3. EBV-LCL panels to determine off-target reactivity against other peptide-HLA complexes.** T cell clones were overnight stimulated with multiple EBV-LCLs. These EBV-LCL panels comprised of different EBV-LCLs expressing all HLA alleles with a prevalence of >1% in the Caucasian population. Peptide loaded HLA Td Raji cells were included as positive control (Ct) for T-cell function. The 4A2 clone (MAGE-A1 KVL/A2) demonstrated reactivity against 2 EBV-LCLs, the HLA restriction of this reactivity could not be identified, and therefore this T cell clone was excluded from further analyses. The 3G2 clone (MAGE-A1 RVR/B7) demonstrated reactivity against the HLA-A\*68:02 positive EBV-LCLs. Values and error bars represent mean and standard deviations of technical duplicates.

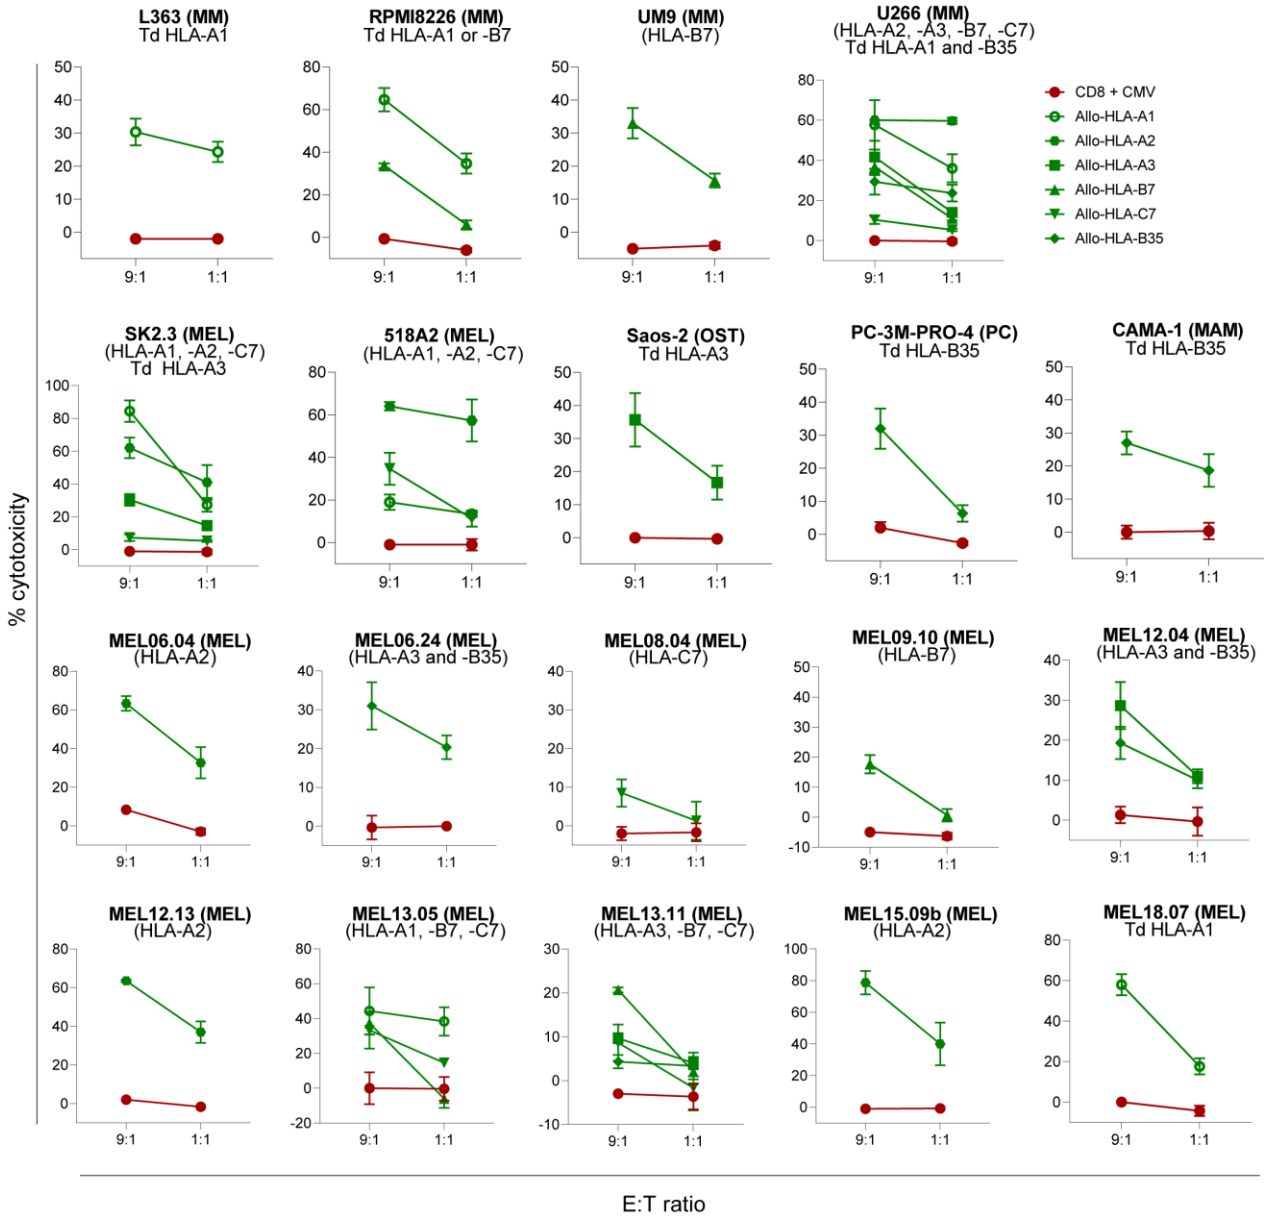

**Figure S4. Positive and negative controls included for each target in the cytotoxicity assays.** CMV TCR-T cell was included as a negative control (red) and an allo-HLA reactive T cell clone against the HLA of interest as a positive control (green). The tumor cell lines included were; Multiple myeloma (MM), melanoma (MEL), osteosarcoma (OST), prostate carcinoma (PC), and mammary carcinoma (MAM). Transduced HLA alleles are depicted in the graphs and naturally expressed HLA alleles are depicted between brackets. Cytotoxicity was assessed by an 6-hour <sup>51</sup>Cr-release assay with E:T ratio 9:1 and 1:1. Technical triplicates are depicted in the graph and the values are a representatives of at least two independent experiments.

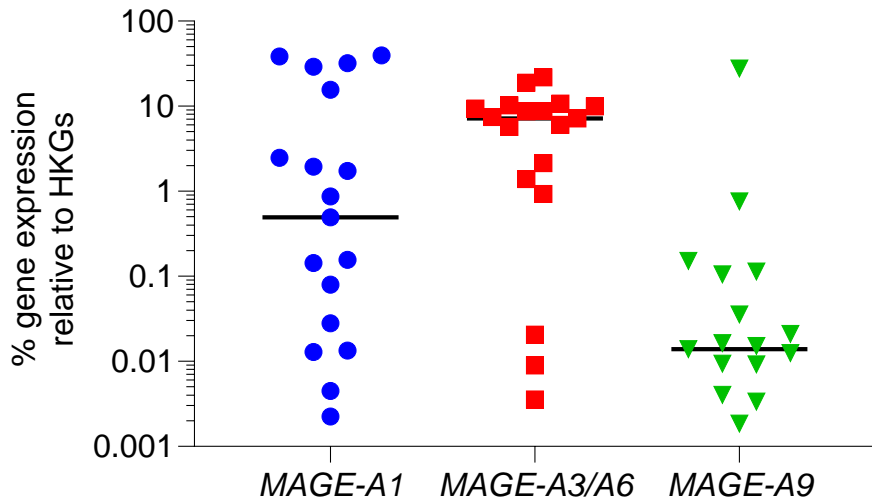

**Figure S5. *MAGE-A1*, *MAGE-A3/A6* and *MAGE-A9* mRNA expression levels of early passage melanomas (passage  $\leq 10$ ) as measured by qPCR. *MAGE-A3* and *MAGE-A6* gene expression could not be discriminated from each other by qPCR. Gene expression  $>0.001\%$  is depicted in the graph.**

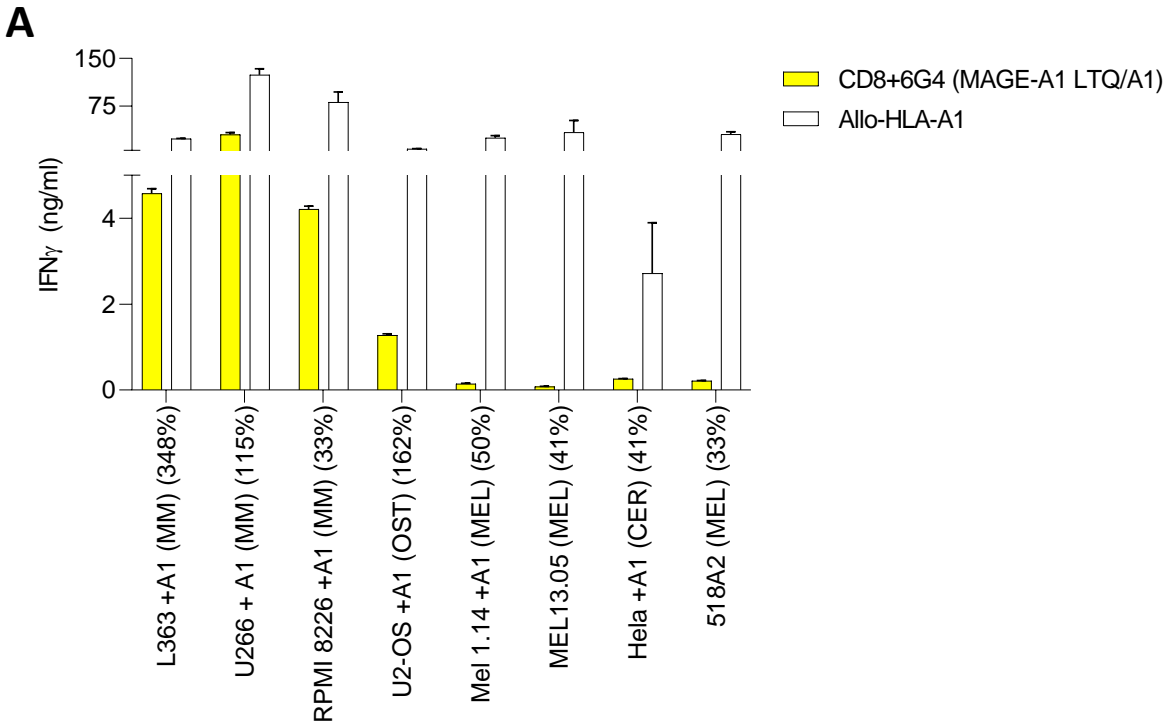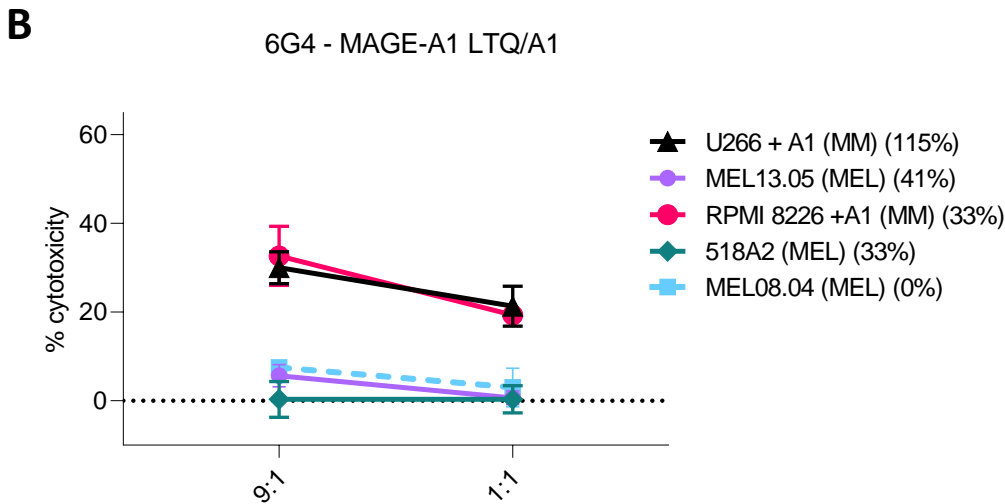

**Figure S6. Reactivity of the 6G4 (MAGE-A1 LTQ/A1) TCR-T cells against tumor cell lines.** (A) The 6G4 (MAGE-A1 LTQ/A1) TCR-T cells were overnight stimulated with MAGE-A1 expressing tumor cell lines of different origin including; melanoma (MEL), multiple myeloma (MM), cervical carcinoma (CER) and osteosarcoma (OST) cell lines. An allo-HLA reactive T cell clone was included to confirm proper HLA expression and recognition capacity of the targets. *MAGE-A1* gene expression levels, measured by qPCR, are depicted between brackets as percentage relative to housekeeping genes. Recognition was determined by IFN- $\gamma$  production as measured by ELISA. Values and error bars represent mean and standard deviations of technical duplicates. (B) Cytotoxicity was assessed by a 6-hour  $^{51}\text{Cr}$ -release assay at E:T ratio 9:1 and 1:1. Technical triplicates are depicted in the graph and the values are a representative of at least two independent experiments.



| Table S1. Peptide-HLA complexes and selected MAGE-specific T cell clones |                     |               |                       |                     |                                              |                            |                    |
|--------------------------------------------------------------------------|---------------------|---------------|-----------------------|---------------------|----------------------------------------------|----------------------------|--------------------|
| Target peptide                                                           | HLA-restriction     | Target gene   | Eluted from           | NetMHC <sup>A</sup> | Recognition pattern identified T cell clones |                            |                    |
|                                                                          |                     |               |                       |                     | Td gene <sup>B</sup>                         | Potent & safe <sup>C</sup> | Final <sup>D</sup> |
| ALIEVGPDPHFC                                                             | A*02:01             | MAGE-C2       | OvaL10                | 7206                | -                                            | -                          |                    |
| ALKDVEERV                                                                | A*02:01             | MAGE-C2       | -                     | 470                 | 1                                            | -                          |                    |
| ALKLKVAEL                                                                | B*08:01             | MAGE-A9       | RPMI8226 +B8          | 71                  | -                                            | -                          |                    |
| ALREEEEGV                                                                | A*02:01             | MAGE-A1       | U266, C4-2B4, OvaL11  | 825                 | 1                                            | -                          |                    |
| EADPTGHSY                                                                | A*01:01             | MAGE-A1       | -                     | 42                  | 2                                            | -                          |                    |
| EVDPIGHLY                                                                | A*01:01/<br>B*35:01 | MAGE-A3       | -<br>-                | 11<br>297           | 7<br>6                                       | -<br>3                     | -<br>1(2H9)        |
| FPSLREAAL                                                                | B*07:02             | MAGE-A1       | U266 and OvaL11       | 9                   | 2                                            | -                          |                    |
| FVYGEPREL                                                                | A*02:01             | MAGE-C2       | U266                  | 512                 | 3                                            | -                          |                    |
| GLLGDNQIMPK                                                              | A*03:01             | MAGE-A1/A3/A6 | U266, RPMI8226 +A3    | 206                 | 3                                            | -                          |                    |
| GVYAGREHFV                                                               | A*02:01             | MAGE-C2       | U266                  | 975                 | 2                                            | -                          |                    |
| GVYDGREHTV                                                               | A*02:01             | MAGE-A4       | U266, UM9 +A2, OvaL10 | 1752                | 1                                            | -                          |                    |
| IMPKAGLLII                                                               | A*24:02             | MAGE-A3       | OvaL1                 | 413                 | -                                            | -                          |                    |
| IVLGVILTK                                                                | A*03:01             | MAGE-A9       | RPMI8226 +A3          | 27                  | -                                            | -                          |                    |
| KIWEELSVLEV                                                              | A*02:01             | MAGE-A3/A6    | U266                  | 87                  | -                                            | -                          |                    |
| KVLEFLAKL                                                                | A*02:01             | MAGE-C2       | U266                  | 25                  | 3                                            | -                          |                    |
| KVLEYVIKV                                                                | A*02:01             | MAGE-A1       | U266                  | 7                   | 18                                           | 3                          | 1 (4F7)            |
| LTQDLVQEKYLEY                                                            | A*01:01             | MAGE-A1       | RPMI8226 +A1          | 126                 | 1                                            | 1                          | 1 (6G4)            |
| LVFGIELMEV                                                               | A*02:01             | MAGE-A3       | -                     | 41                  | 6                                            | -                          |                    |
| RCFPVIFGK                                                                | A*03:01             | MAGE-A4       | U266, UM9 +A3         | 217                 | -                                            | -                          |                    |
| RPADLTRVIM                                                               | B*07:02             | MAGE-A11      | OvaL10                | 9                   | -                                            | -                          |                    |
| RVRFFFPSL                                                                | B*07:02             | MAGE-A1       | U266                  | 75                  | 61                                           | 3                          | 1 (3G2)            |
| RVRFFFPSLR                                                               | A*03:01             | MAGE-A1       | Prediction            | 46                  | -                                            | -                          |                    |
| RVRIAYPSL                                                                | B*07:02             | MAGE-A4       | U266                  | 53                  | -                                            | -                          |                    |
| RVRIAYPSLR                                                               | A*03:01             | MAGE-A4       | U266                  | 120                 | 7                                            | -                          |                    |
| SLFRAVITK                                                                | A*03:01             | MAGE-A1       | U266                  | 14                  | 39                                           | 2                          | 1 (3H4)            |
| SMLGDGHSMPK                                                              | A*03:01             | MAGE-A9       | RPMI8226 +A3          | 68                  | -                                            | -                          |                    |
| SVMGVYVGK                                                                | A*03:01             | MAGE-A9       | RPMI8226+A3           | 29                  | -                                            | -                          |                    |
| TLDEKVAEL                                                                | A*02:01             | MAGE-C2       | U266                  | 19                  | 2                                            | -                          |                    |
| TQDLVQEKY                                                                | A*01:01             | MAGE-A1/B1/B4 | RPMI8226 +A1          | 562                 | -                                            | -                          |                    |
| VAELVHFL                                                                 | A*24:02             | MAGE-A3       | -                     | 7689                | 1                                            | -                          |                    |
| VIWEVLNAV                                                                | A*02:01             | MAGE-C2       | -                     | 11                  | 5                                            | -                          |                    |
| VLGEEQEGV                                                                | A*02:01             | MAGE-A9       | RPMI8226 +A2          | 167                 | -                                            | -                          |                    |
| VRRFFFPSL                                                                | C*07:01/<br>C*07:02 | MAGE-A1       | Prediction/<br>U266   | 8807<br>5858        | 2<br>13                                      | -<br>1                     | -<br>1(10C1)       |
| YPSLREAAL                                                                | B*07:02             | MAGE-A4       | U266, UM9             | 7                   | -                                            | -                          |                    |
| YVGKEHMF                                                                 | A*24:02             | MAGE-A9       | RPMI8226 +A24         | 3852                | -                                            | -                          |                    |
| YVGKEHMFY                                                                | A*01:01             | MAGE-A9       | RPMI8226 +A1          | 341                 | 1                                            | 1                          | 1 (2D8)            |

MAGE specific peptides were identified from multiple myeloma cell lines U266, UM9 and RPMI8226; prostate cancer cell line C4-2B4, and primary ovarian carcinoma samples OvaL1, OvaL10, and OvaL11.

<sup>A</sup>Predicted NetMHC 4.0 affinity (nM)

<sup>B</sup>T cell clones produce IFN- $\gamma$  after stimulation with MAGE-gene transduced Raji cell.

<sup>C</sup>T cell clones that show potent and strict recognition against Tumor cell line panels, EBV-LCL panel and MAGE-A panel.

<sup>D</sup>The final selection of most promising T cell clones for TCR gene therapy

**Table S2. HLA-typing of EBV-LCLs used in EBV-LCL screenings**

| <b>EBV-LCL</b> | <b>HLA-A</b>  | <b>HLA-B</b>  | <b>HLA-C</b>  |
|----------------|---------------|---------------|---------------|
| 55             | 01 – 68       | 08 – 53       | 04 - 07       |
| 1854           | 02:01 - 30:02 | 15:01 - 39:01 | 03:03 - 12:03 |
| 2065           | 01:01 - 02:01 | 37:01 - 39:01 | 06:02 - 07:02 |
| 2631           | 02:01 - 03:01 | 44:02 - 57:01 | 06:02 - 07:04 |
| 3281           | 01:01 - 32:01 | 08:01 - 45:01 | 06:02 - 07:01 |
| 3480           | 26:01 - 01:01 | 38:01 - 18:01 | 12:03 - 07:01 |
| 3516           | 03:01 - 26:01 | 07:02 - 14:01 | 07:02 - 08:02 |
| 3829           | 01:01 - 68:01 | 44:02         | 05:01 - 07:04 |
| 4084           | 03:01 - 30:01 | 07:02 - 38:01 | 07:02 - 12:03 |
| 4582           | 01 - 30:01    | 08:01 - 40:01 | 03:04 - 07:01 |
| 4803           | 03:01 - 33:01 | 07:02 - 14:02 | 07:02 - 08:02 |
| 4991           | 26:01 - 31:01 | 14:01 - 49:01 | 07:01 - 08:02 |
| 5171           | 02:01 - 66:01 | 40:01 - 41:02 | 03:04 - 17    |
| 5283           | 24:02 - 66:01 | 14:02 - 39:06 | 07:02 - 08:02 |
| 5524           | 02:01 - 31:01 | 15:01 - 15:17 | 03:04 - 07:01 |
| 5439           | 03:01 - 25:01 | 15:17 - 18:01 | 07:01 - 12:03 |
| 5696           | 02:05         | 58:01         | unknown       |
| 5702           | 32:01 - 68:01 | 35:03 - 52:01 | 12:02 - 12:03 |
| 5769           | 02:01 - 68:01 | 35:03 - 37:01 | 04:01 - 06:02 |
| 5857           | 30:04 - 68:02 | 38:01 - 55:01 | 03:03 - 12:03 |
| 5866           | 02:01 - 11:01 | 35:01 - 51:01 | 04:01 - 14:02 |
| 5989           | 11:01 - 68:01 | 38:01 - 39:01 | 07:02 - 12:03 |
| 6023           | 03:01 - 11:01 | 40:02 - 56:01 | 01:02 - 02:02 |
| 6268           | 02:01 - 24:02 | 35:02 - 44:02 | 04:01 - 05:01 |
| 6316           | 29:02 - 30:01 | 13:02 - 44:03 | 06:02 - 16:01 |
| 6461           | 02:01         | 40:02         | 02:02         |
| 6463           | 02:01         | 57:01         | 06:02         |
| 6945           | 03:01 - 25:01 | 18:01 - 35:01 | 04:01 - 12:03 |
| 6978           | 02:01 - 02:05 | 15:01 - 45:01 | 01:02 - 06:02 |
| 7007           | 02:05 - 29:02 | 27:05 - 44:03 | 01:02 - 16:01 |
| 7159           | 02:01         | 13:02 - 44:02 | 05:01 - 06:02 |
| 7394           | 01:01 - 32:01 | 35:08         | 04:01         |
| 7590           | 24:02 - 31:01 | 07:02 - 35:08 | 04:01 - 07:02 |
| 7613           | 01:01 - 24:02 | 15:01 - 37:01 | 03:03 - 06:02 |
| 7929           | 01:01         | 35:02 - 52:01 | 04:01 - 12:02 |
| 8419           | 02:01 - 01:01 | 50:01 - 07:02 | 07:02 - 06:02 |
| 8425           | 23:01 - 02:01 | 41:01 - 40:01 | 17:01 - 03:04 |
| 8428           | 11:01 - 01:01 | 57:01 - 35:01 | 06:02 - 04:01 |
| 8463           | 11:01 - 01:01 | 51:01 - 50:01 | 15:02 - 06:02 |
| 8466           | 23:01         | 51:01 - 41:01 | 17:01 - 15:02 |
| 9210           | 02:01         | 15:01 - 51:01 | 03:03 - 15:02 |
| 9271           | 33:01 - 66:01 | 58:01 - 58:02 | 03:02 - 06:02 |
| 9619           | 01:01 - 33:03 | 44:03 - 51:01 | 07:06 - 14:02 |
| 9877           | 01:01 - 23:01 | 08:01 - 41:02 | 07:01 - 17:03 |
| 9779           | 02:01 - 03:01 | 08:01 - 50:01 | 06:02 - 07:01 |
| 10120          | 02:01 - 24:02 | 07:02 - 40:02 | 02:02 - 07:02 |
| 10299          | 02:01 - 11:01 | 44:05 - 51:01 | 02:02 - 14:02 |
| 12425          | 23:01 - 36:01 | 15:03 - 53:01 | 02:10 - 04:01 |

| <b>Table S3. Primers included in the RT-qPCR experiments</b> |                          |                       |
|--------------------------------------------------------------|--------------------------|-----------------------|
| <b>Gene</b>                                                  | <b>Forward primer</b>    | <b>Reverse primer</b> |
| <i>MAGE-A1</i>                                               | GAGTCCTTGTTCCGAGCAGT     | GGCTCCCTGGCTCGATATTT  |
| <i>MAGE-A3/A6</i>                                            | CCTGAGCAACGAGCGACG       | TCAGAACCTTGCCTCCTCACC |
| <i>MAGE-A9</i>                                               | GATCCTGCGCACTACGAGTT     | ATGGGTAGCAGATGGGCTCT  |
| <i>GUSB</i>                                                  | ACTGAACAGTCACCGACGAG     | GGAACGCTGCACTTTTTGGT  |
| <i>PSMB4</i>                                                 | GTTTCCGCAACATCTCTCGC     | CATCAATCACCATCTGGCCG  |
| <i>VPS29</i>                                                 | TGAGAGGAGACTTCGATGAGAATC | TCTGCAACAGGGCTAAGCTG  |
